# Supplementary material for: Beyond Nitrogen in the Oxygen Reduction Reaction on Nitrogen-Doped Carbons: A NEXAFS Investigation
Source: MDPI journal article supplement (doi:10.3390/nano11051198), 2021-05-01
Supplement: s1 [file s1]

# Beyond Nitrogen in the Oxygen Reduction Reaction on Nitrogen-Doped Carbons: A NEXAFS Investigation

Eugenia Tanasa <sup>1</sup>, Florentina Iuliana Maxim <sup>2</sup>, Tugce Erniyazov <sup>2</sup>, Matei-Tom Iacob <sup>2</sup>, Tomáš Skála <sup>3</sup>, Liviu Cristian Tanase <sup>4</sup>, Cătălin Ianăși<sup>5</sup>, Cristina Moiescu <sup>6</sup>, Cristina Miron <sup>7</sup>, Ioan Ardelean <sup>6</sup>, Vlad-Andrei Antohe <sup>7,8</sup>, Eugenia Fagadar-Cosma <sup>5</sup> and Serban N. Stamatina <sup>2,7,\*</sup>

<sup>1</sup> Faculty of Applied Chemistry and Materials Science, Politehnica University of Bucharest, Splaiul Independentei Str. No. 313, 060042 Bucharest, Romania; eugenia.tanasa@physics.pub.ro

<sup>2</sup> Nano-SAE Research Centre, University of Bucharest, Atomistilor 405, 077125 Magurele, Ilfov, Romania; iuliana.maxim@3nanosae.org (I.M.); tugcegoktas95@gmail.com (T.G.); tom.iacob@3nanosae.org (T.I.)

<sup>3</sup> Department of Surface and Plasma Science, Charles University, V Holešovičkách 2, 18000 Prague, Czech Republic; tomas.skala@elettra.eu

<sup>4</sup> National Institute of Materials Physics, Atomistilor 405A, 077125 Magurele, Ilfov, Romania; [liviu.tanase@infim.ro](mailto:liviu.tanase@infim.ro)

<sup>5</sup> “Coriolan Drăgulescu” Institute of Chemistry, Mihai Viteazul Ave. 24, 300223 Timisoara, Romania; [cianasic@yahoo.com](mailto:cianasic@yahoo.com) (C.I.); efagadarcosma@acad-icht.tm.edu.ro (E.F.-C.)

<sup>6</sup> Department of Microbiology, Institute of Biology Bucharest, Splaiul Independenței 296, 060031, Bucharest, Romania; cristina.moiescu@yahoo.com (C.M.); ioan.ardelean@ibiol.ro (I.I.A.)

<sup>7</sup> Faculty of Physics, University of Bucharest, Atomistilor 405, 077125 Magurele, Ilfov, Romania; [cristina.miron@fizica.unibuc.ro](mailto:cristina.miron@fizica.unibuc.ro) (C.M.); vlad.antohe@fizica.unibuc.ro (V.A.A.)

<sup>8</sup> Institute of Condensed Matter and Nanosciences (IMCN), Université catholique de Louvain (UCLouvain), Place Croix du Sud 1, B-1348 Louvain-la-Neuve, Belgium

\* Correspondence: serban@3nanosae.org or serban.stamatin@unibuc.ro; Tel.: +40-214574838

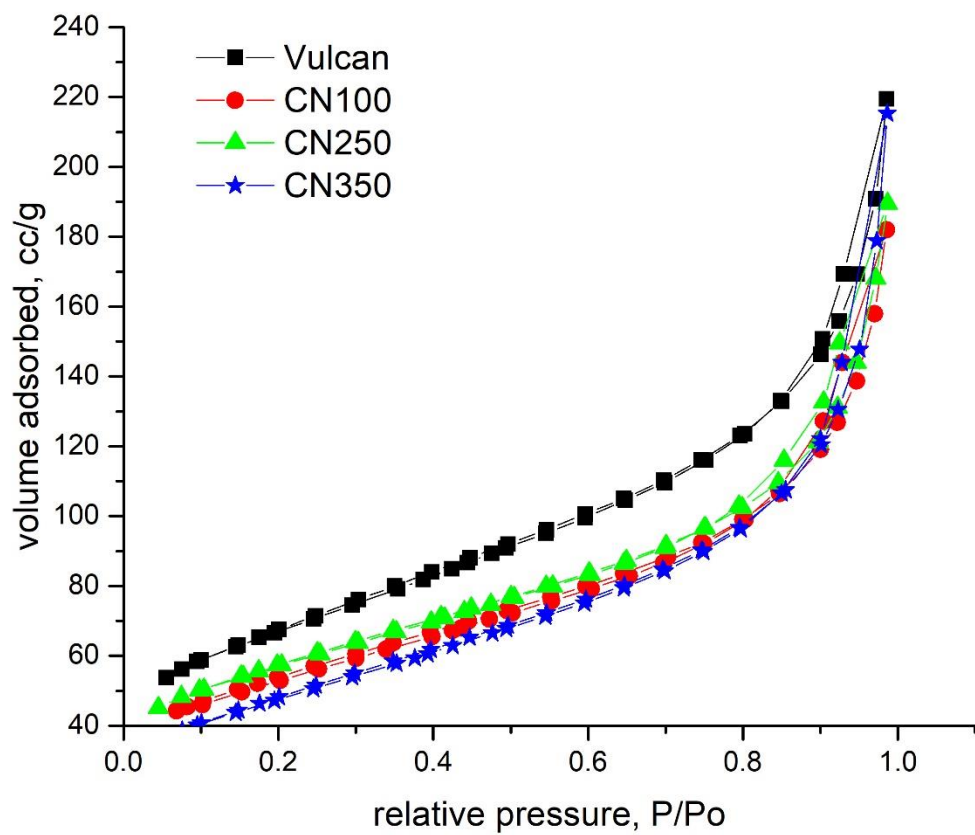

**Figure S1.** Nitrogen adsorption/desorption isotherms for Vulcan (black), CN100 (red), CN250 (green), CN350 (blue) samples.

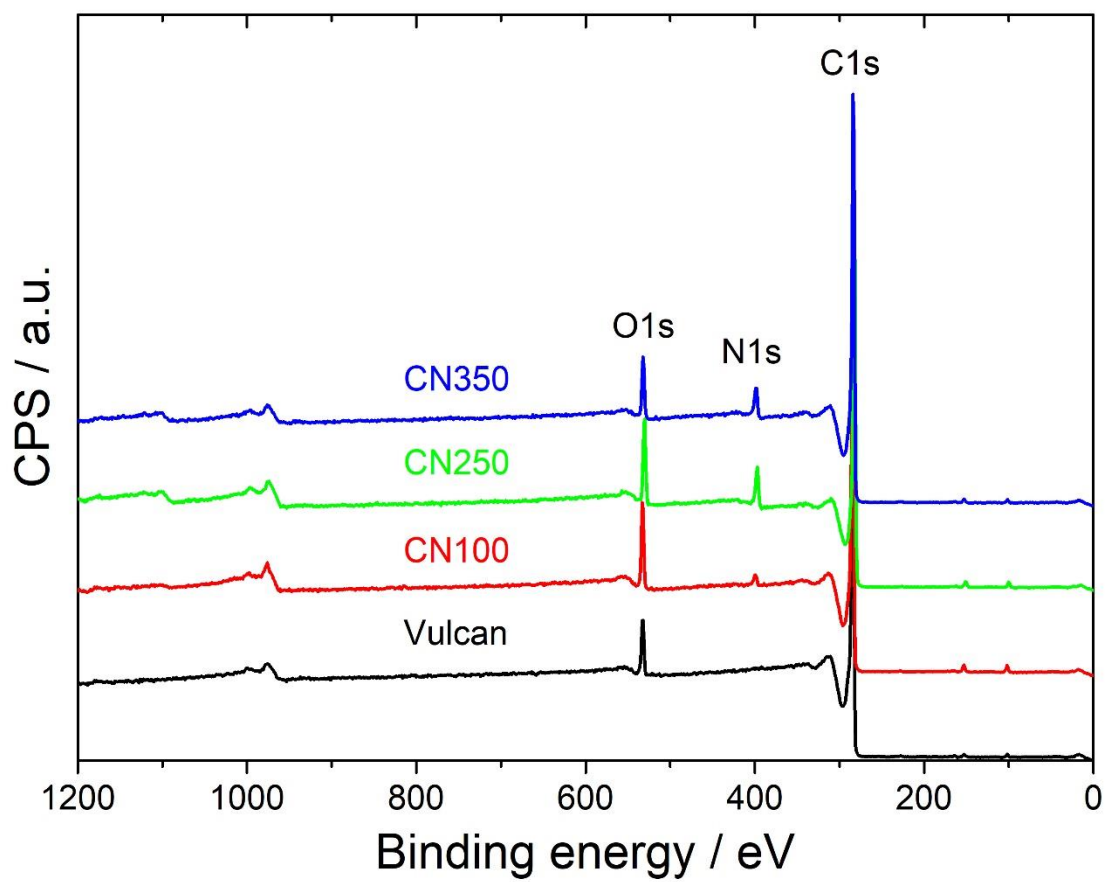

**Figure S2.** Wide spectrum X-ray photoelectron spectroscopy.

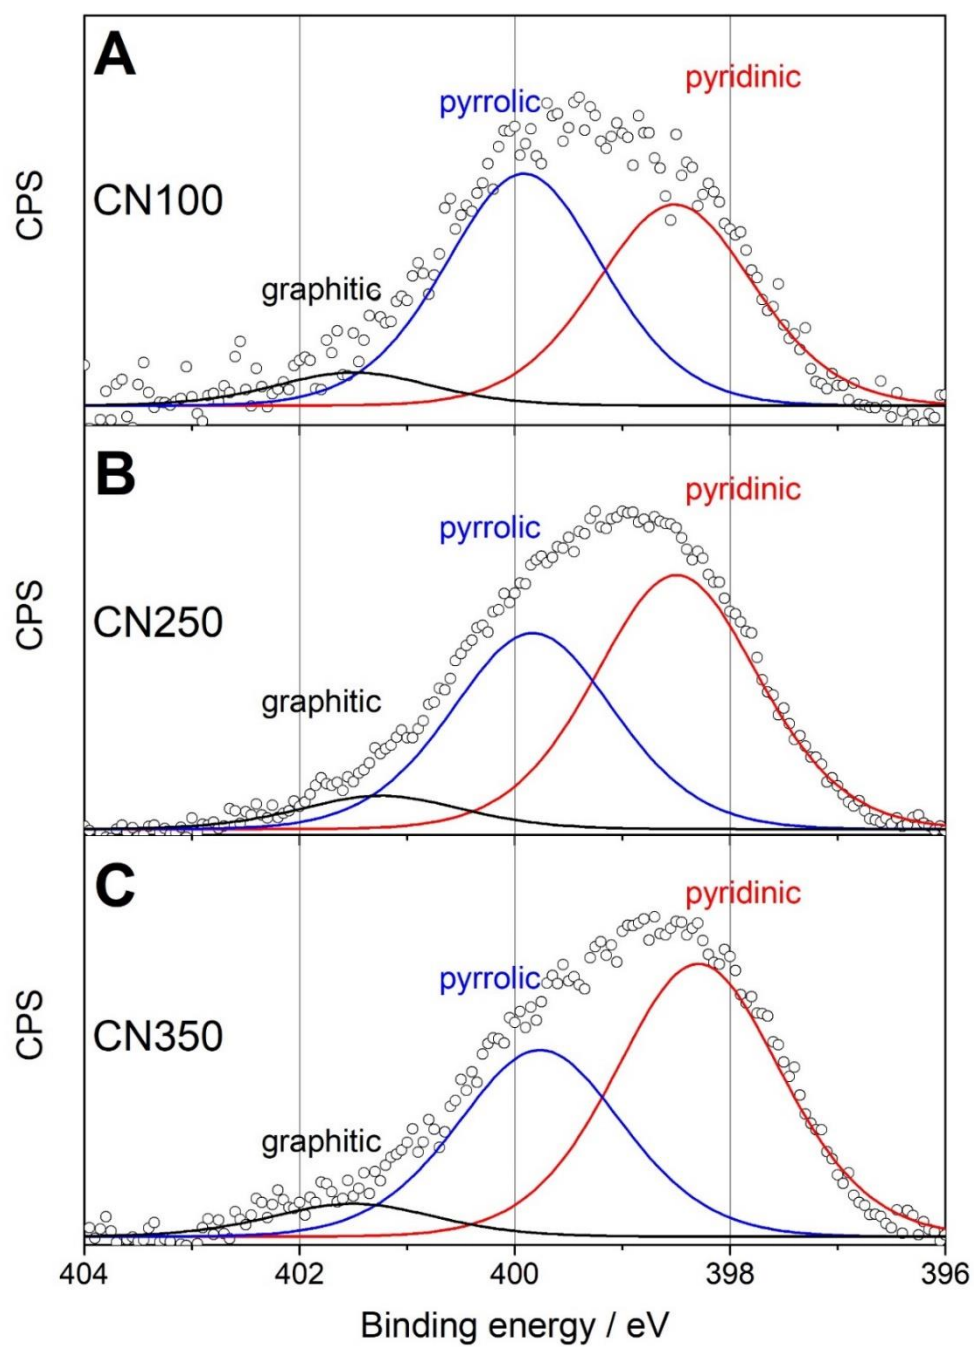

**Figure S3.** Deconvolution of the N 1s peak obtained from the synchrotron radiation photoelectron spectroscopy.

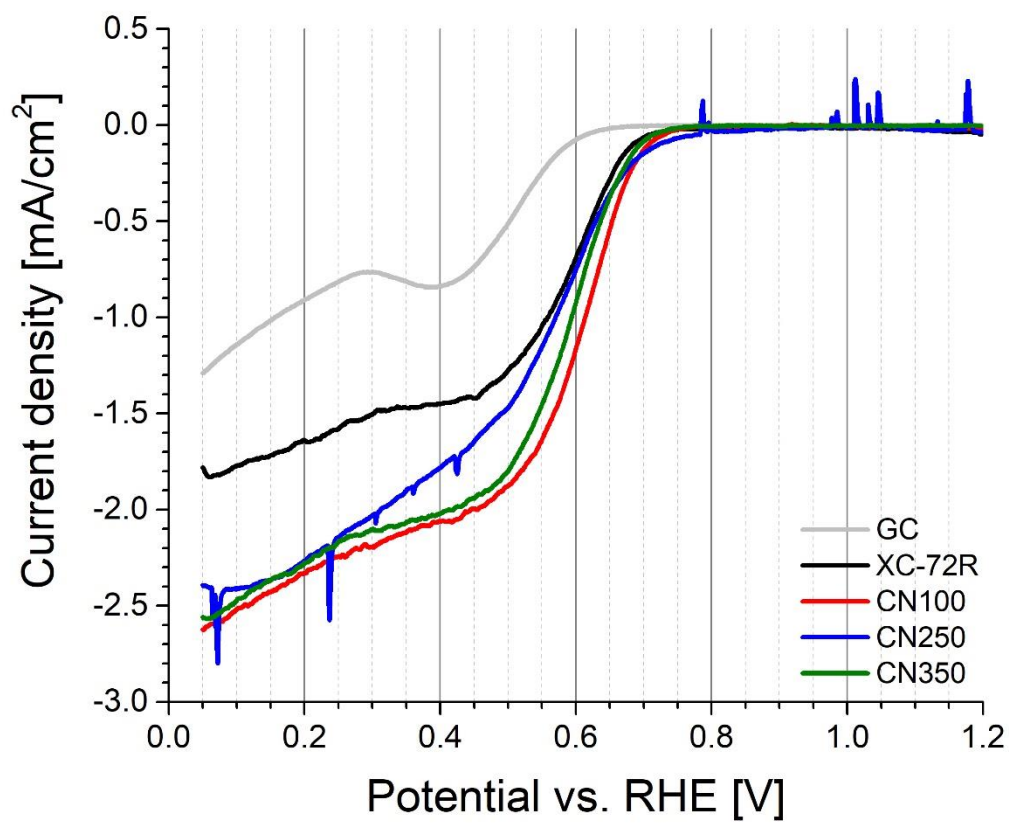

**Figure S4.** Oxygen reduction reaction curves obtained at 20 mV s<sup>-1</sup> at 900 rpm in O<sub>2</sub> saturated 0.1 M KOH.

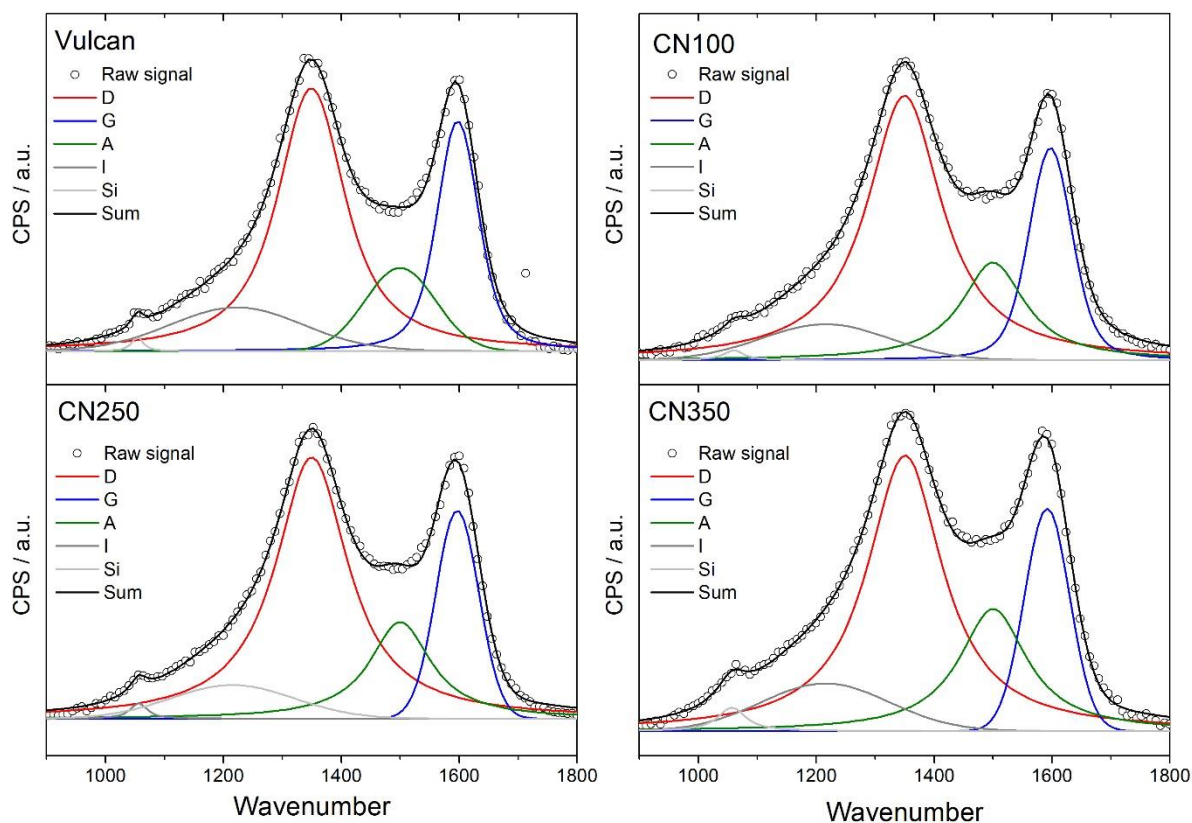

**Figure S5.** Raman peaks recorded for Vulcan, CN100, CN250 and CN350 with a 532 nm laser and a bandstop filter to remove the Rayleigh component. Deconvolution was done in Fityk with Voigt functions only. The A peak was locked at 1500 cm<sup>-1</sup> while other peaks were allowed to shift by less than 5 cm<sup>-1</sup>.

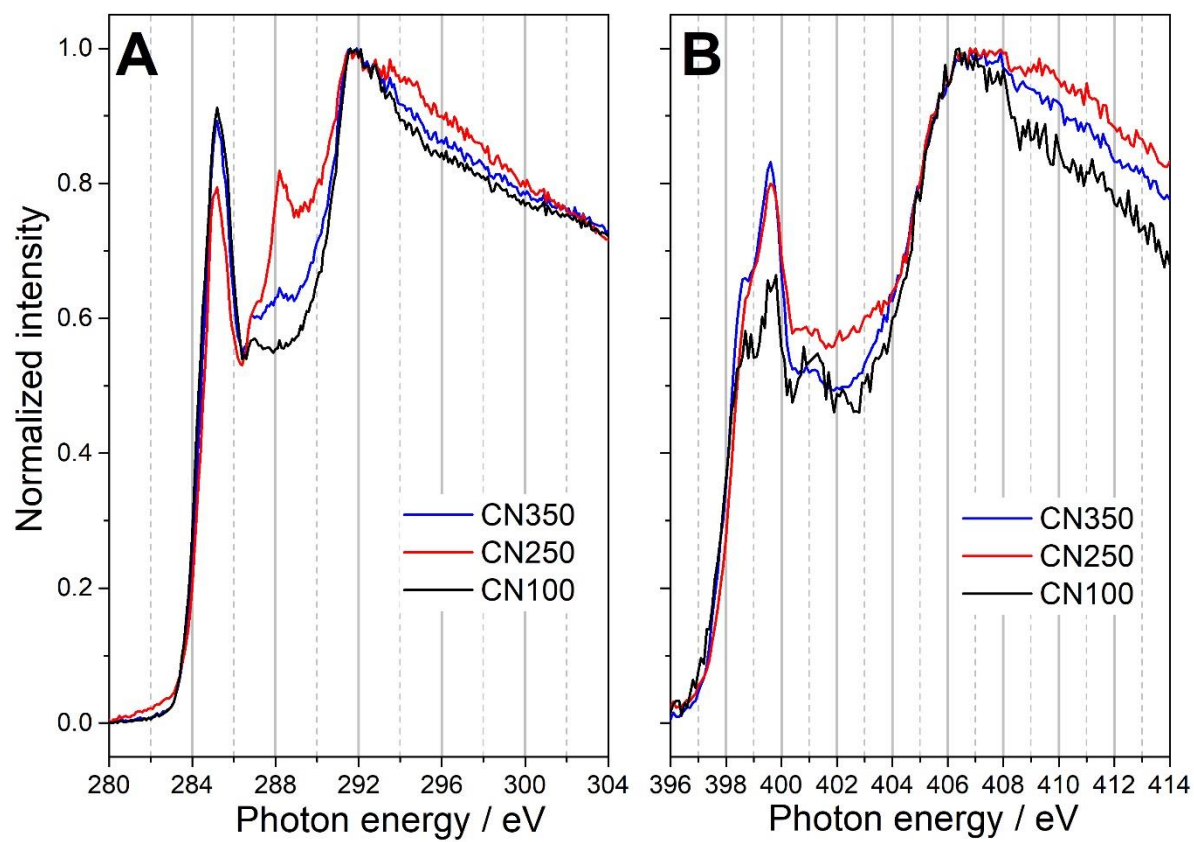

**Figure S6.** Near edge X-ray absorption fine structure of nitrogenated samples.

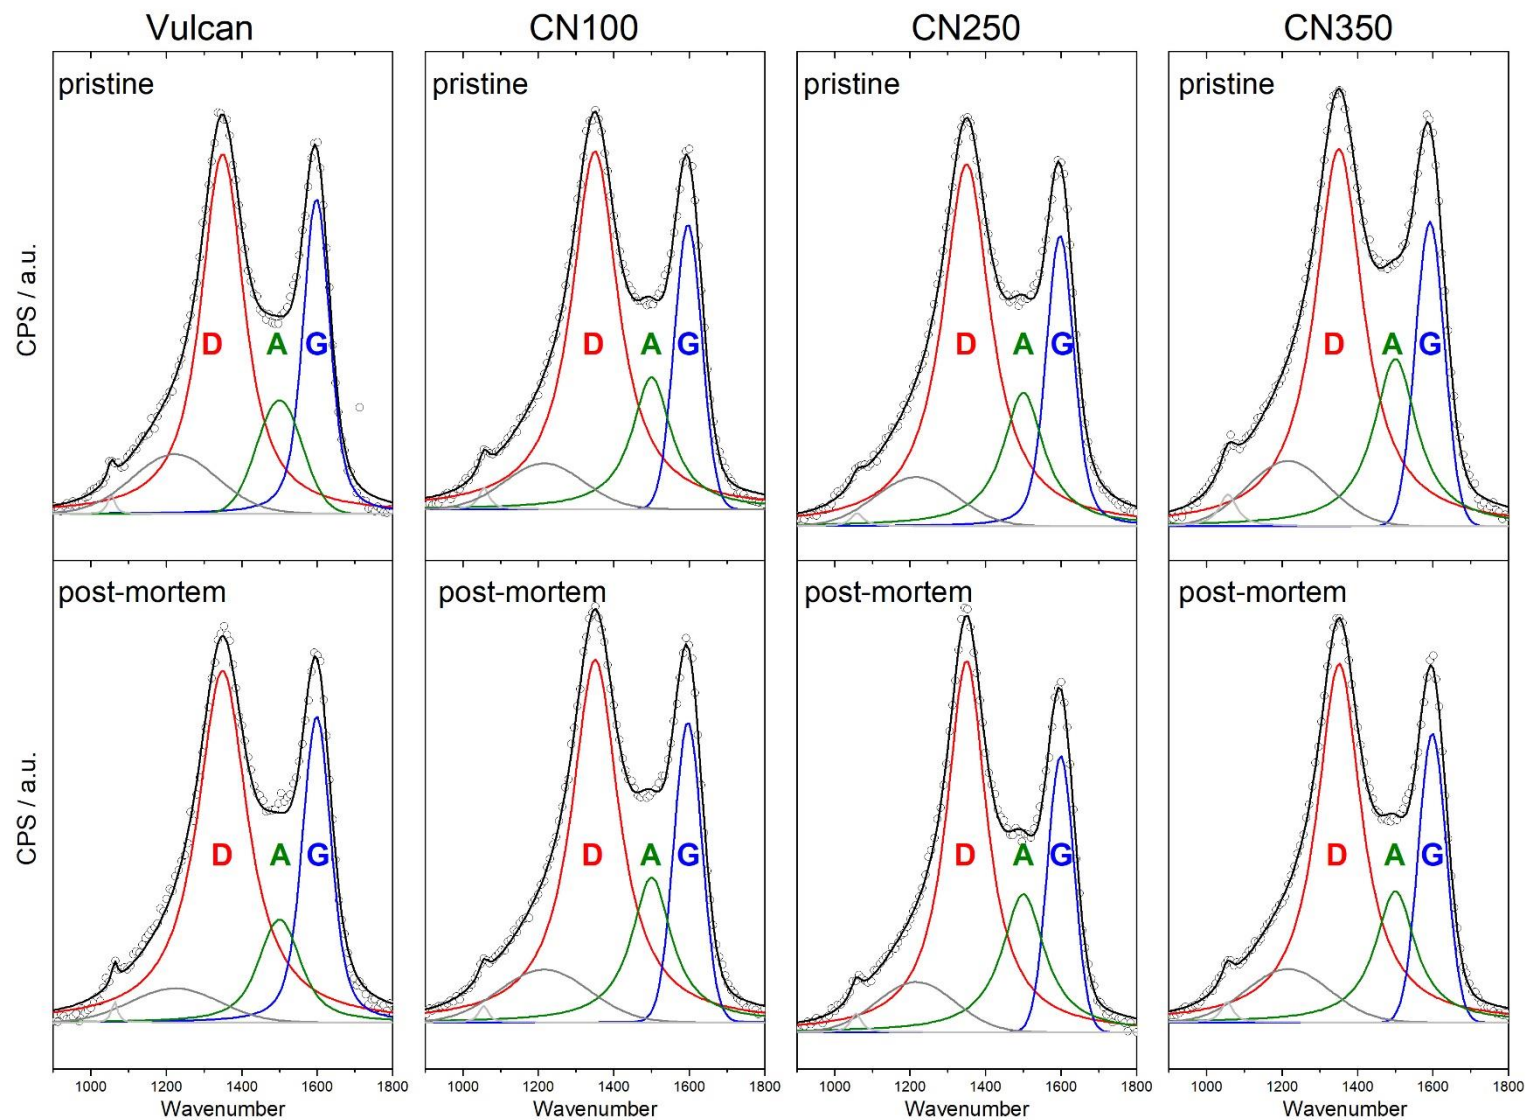

**Figure S7.** Raman spectra of pristine samples (top row) and post-mortem samples (bottom row). Pristine samples were identical to Figure S4. The deconvolution procedure used in Figure S4 was applied here. Post-mortem samples were subjected to a 6 h accelerated stress test between 0.05 and 1.20 V vs. RHE in 0.1 M KOH.



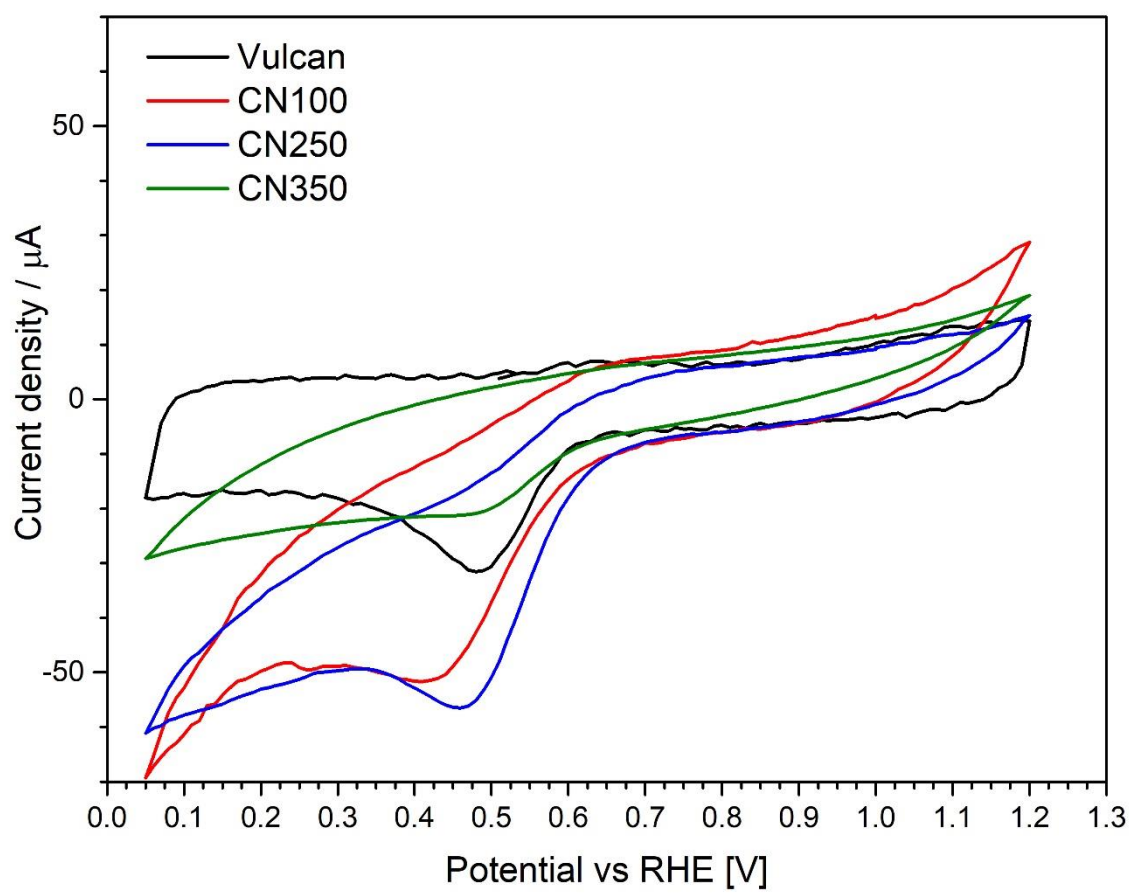

**Figure S8.** CVs at the end of the accelerated stress test (6 h scanned at  $0.1 \text{ V s}^{-1}$  between 0.05 and 1.20 V vs. RHE in 0.1 M KOH).
